# Supplementary material for: Direct synthesis of α-hydroxyacetophenones through molecular iodine activation of carbon–carbon double bonds
Source: Royal Society of Chemistry journal article supplement (doi:10.1039/c4ra07012g), 2014-10-07

*Supporting Information*

**Direct synthesis of  $\alpha$ -Hydroxyacetophenones through molecule iodine activation of carbon–carbon double bond**

Xia Wu, Qinghe Gao, Mi Lian, Shan Liu, Anxin Wu\*

Key Laboratory of Pesticide and Chemical Biology, Ministry of Education, Central China Normal University,  
Wuhan 430079, People's Republic of China

E-mail: chwuax@mail.ccnu.edu.cn

| <b>Table of Contents</b>                                                                 | <b>page</b> |
|------------------------------------------------------------------------------------------|-------------|
| 1. General remarks.....                                                                  | S2          |
| 2. General procedures for the synthesis of <b>2</b> and Characterization Data.....       | S2-S6       |
| 3. Reference.....                                                                        | S6          |
| 4. Crystallographic data and molecular structure of compounds <b>2g</b> and <b>C</b> ... | S6-S7       |
| <b>5. Labeling experiments.....</b>                                                      | <b>S7</b>   |
| 6. <sup>1</sup> H and <sup>13</sup> C NMR spectra of compounds <b>2</b> .....            | S8-S22      |

## 1. General remarks

All substrates and reagents were commercially available and used without further purification. TLC analysis was performed using pre-coated glass plates. Column chromatography was performed using silica gel (200–300 mesh). IR spectra were recorded on a Perkin-Elmer PE-983 infrared spectrometer as KBr pellets with absorption in  $\text{cm}^{-1}$ .  $^1\text{H}$  spectra were recorded in  $\text{CDCl}_3$  on 400/600 MHz NMR spectrometers and resonances ( $\delta$ ) are given in parts per million relative to tetramethylsilane. Data are reported as follows: chemical shift, multiplicity (s = singlet, d = doublet, t = triplet, m = multiplet), coupling constants (Hz) and integration.  $^{13}\text{C}$  spectra were recorded in  $\text{CDCl}_3$  on 100 MHz NMR spectrometers and resonances ( $\delta$ ) are given in ppm. MS was carried out on a Finnigan Trace MS spectrometer (EI, 70 eV). The X-ray crystal-structure determinations of **2g** and **C** was obtained on a Bruker SMART APEX CCD system. Melting points were determined using XT-4 apparatus and not corrected.

## 2. General procedures for the synthesis of 2 and Characterization Data

**General procedure for synthesis of 2 (2a as an example):** A mixture of styrene **1a** (1.0 mmol), iodine (1.0 mmol), and TBHP (4.0 mmol, 65% aq. Solution and purchase from Sinopharm Chemical Reagent Co., Ltd) in DMSO (3.0 mL) was stirred at room temperature till almost full conversion of the substrates by TLC analysis, then extracted with EtOAc 3 times ( $3 \times 30\text{mL}$ ). The extract was washed with 10%  $\text{Na}_2\text{S}_2\text{O}_3$ . After drying over  $\text{Na}_2\text{SO}_4$  and evaporation, The crude product was purified by column chromatography on silica gel (eluent: petroleum ether/EtOAc) to afford the product **2a**.

### Characterization of Products

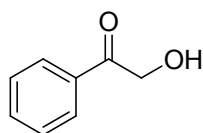

#### 2-hydroxy-1-phenylethanone (**2a**):<sup>[1]</sup>

Yield 80%; light yellow solid; mp 74–77°C; IR (KBr): 3426, 3389, 1686, 1447, 1405, 1233, 1106, 972, 757, 688, 615  $\text{cm}^{-1}$ ;  $^1\text{H}$  NMR (600 MHz,  $\text{CDCl}_3$ ):  $\delta$  (ppm) 7.93 (d,  $J = 7.2$  Hz, 2H), 7.64 (t,  $J = 7.2$  Hz, 1H), 7.51 (t,  $J = 7.2$  Hz, 2H), 4.89 (s, 2H), 3.56 (s, 1H);  $^{13}\text{C}$  NMR (100 MHz,  $\text{CDCl}_3$ )  $\delta$  (ppm) 198.4, 134.3, 133.3, 128.9, 127.7, 65.4; MS (EI):  $m/z$  137.17 (M+1, 0.25%), 136.10 (M, 2.26), 105.05 (100).

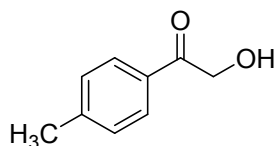

#### 2-hydroxy-1-(p-tolyl)ethanone (**2b**):<sup>[1]</sup>

Yield 83%; light yellow solid; mp 67–70°C; IR (KBr): 3440, 1679, 1608, 1416, 1284, 1178, 754  $\text{cm}^{-1}$ ;  $^1\text{H}$  NMR (400 MHz,  $\text{CDCl}_3$ ):  $\delta$  (ppm) 7.83 (d,  $J = 8.4$  Hz, 2H), 7.64 (d,  $J = 8.0$  Hz, 2H), 4.85 (s, 2H), 3.55 (s, 1H), 2.44 (s, 3H);  $^{13}\text{C}$  NMR (100 MHz,  $\text{CDCl}_3$ )  $\delta$  (ppm) 197.9, 130.8, 129.6, 129.3, 127.8, 65.3, 21.8; MS (EI):  $m/z$  151.49 (M+1, 1.48%), 150.15 (M, 3.85), 149.17 (M-1, 44.37), 119.13 (100).

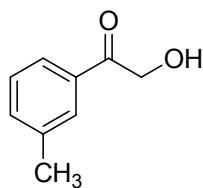

**2-hydroxy-1-(m-tolyl)ethanone (2c):** <sup>[2]</sup>

Yield 78%; yellow oily liquid; IR (KBr): 3451, 1689, 1287, 1098, 1032, 981, 787, 688  $\text{cm}^{-1}$ ; <sup>1</sup>H NMR (600 MHz,  $\text{CDCl}_3$ ):  $\delta$  (ppm) 7.44 (s, 1H), 7.71 (t,  $J = 7.2$  Hz, 1H), 7.44 (d,  $J = 7.2$  Hz, 1H), 7.39 (t,  $J = 7.2$  Hz, 1H), 4.87 (s, 2H), 3.59 (s, 1H), 2.43 (s, 3H); <sup>13</sup>C NMR (100 MHz,  $\text{CDCl}_3$ )  $\delta$  (ppm) 198.5, 138.9, 135.1, 133.4, 128.8, 128.2, 124.9, 65.4, 21.3; MS (EI):  $m/z$  150.12(M, 7.44%), 149.09(M-1, 4.99), 119.07 (100).

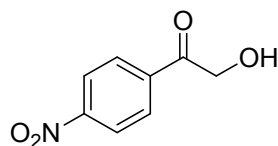

**2-hydroxy-1-(4-nitrophenyl)ethanone (2d):** <sup>[1]</sup>

Yield 65%; light yellow solid; mp 114–117°C; IR (KBr): 3437, 3386, 1687, 1605, 1543, 1348, 1320, 1228, 1108, 978, 856, 609  $\text{cm}^{-1}$ ; <sup>1</sup>H NMR (600 MHz,  $\text{CDCl}_3$ ):  $\delta$  (ppm) 8.37 (d,  $J = 7.8$  Hz, 2H), 8.11 (d,  $J = 7.8$  Hz, 2H), 4.95 (s, 2H), 3.35 (s, 1H); <sup>13</sup>C NMR (100 MHz,  $\text{CDCl}_3$ )  $\delta$  (ppm) 197.2, 137.8, 130.9, 128.8, 124.2, 66.0; MS (EI):  $m/z$  181.02(M, 0.31%), 150.07(100).

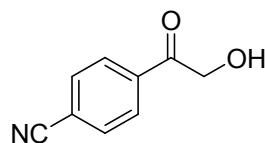

**4-(2-hydroxyacetyl)benzonitrile (2e):** <sup>[3]</sup>

Yield 60%; light yellow solid; mp 74–77°C; IR (KBr): 3448, 2231, 1696, 1289, 1229, 1100, 979, 836, 568  $\text{cm}^{-1}$ ; <sup>1</sup>H NMR (600 MHz,  $\text{CDCl}_3$ ):  $\delta$  (ppm) 8.03 (d,  $J = 8.4$  Hz, 2H), 7.83 (d,  $J = 8.4$  Hz, 2H), 4.92 (s, 2H), 3.56 (s, 1H); <sup>13</sup>C NMR (100 MHz,  $\text{CDCl}_3$ )  $\delta$  (ppm) 197.3, 136.3, 132.8, 128.1, 117.5, 65.8; MS (EI):  $m/z$  161.15(M, 2.95%), 130.07 (100).

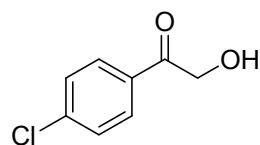

**1-(4-chlorophenyl)-2-hydroxyethanone(2f):** <sup>[1]</sup>

Yield 73%; light yellow solid; mp 109–112°C; IR (KBr): 3429, 3381, 1682, 1591, 1445, 1282, 1112, 1092, 978, 826, 616, 565, 525  $\text{cm}^{-1}$ ; <sup>1</sup>H NMR (400 MHz,  $\text{CDCl}_3$ ):  $\delta$  (ppm) 7.87 (d,  $J = 8.4$  Hz, 2H), 7.49 (d,  $J = 8.4$  Hz, 2H), 4.85 (s, 2H), 3.48 (s, 1H); <sup>13</sup>C NMR (100 MHz,  $\text{CDCl}_3$ )  $\delta$  (ppm) 197.3, 140.8, 131.6, 129.3, 129.0, 65.4; MS (EI):  $m/z$  170.14(M, 4.15%), 139.07 (100).

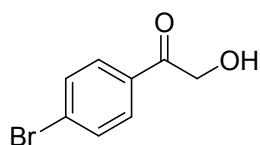

**1-(4-bromophenyl)-2-hydroxyethanone (2g):** <sup>[1]</sup>

Yield 71%; light yellow solid; mp 130–133°C; IR (KBr): 3426, 3380, 1683, 1585, 1412, 1231, 1108, 1069, 977, 822, 565 cm<sup>-1</sup>; <sup>1</sup>H NMR (400 MHz, CDCl<sub>3</sub>): δ (ppm) 7.79 (d, J = 8.4 Hz, 2H), 7.65 (d, J = 8.4 Hz, 2H), 4.86 (s, 2H), 3.49 (s, 1H); <sup>13</sup>C NMR (100 MHz, CDCl<sub>3</sub>) δ (ppm) 197.5, 132.2, 132.0, 129.5, 129.1, 65.4; MS (EI): m/z 216.11 (M+1, 5.28%), 214.04(M-1, 4.80), 185.03 (100).

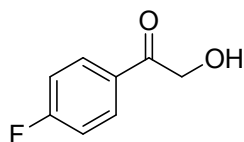

**1-(4-fluorophenyl)-2-hydroxyethanone(2h):** <sup>[3]</sup>

Yield 70%; light yellow solid; mp 104–107°C; IR (KBr): 3426, 3389, 1682, 1597, 1416, 1232, 1159, 1109, 979, 837, 602, 566 cm<sup>-1</sup>; <sup>1</sup>H NMR (400 MHz, CDCl<sub>3</sub>): δ (ppm) 8.05–7.90 (m, 2H), 7.18 (t, J = 8.4Hz, 2H), 4.86 (s, 2H), 3.54 (s, 1H); <sup>13</sup>C NMR (100 MHz, CDCl<sub>3</sub>) δ (ppm) 196.8, 167.5, 165.0, 130.4, 130.3, 116.3, 116.1, 65.3; MS (EI): m/z 154.13 (M, 3.69%), 123.05 (100).

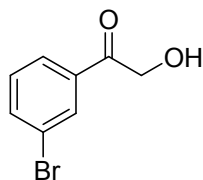

**1-(3-bromophenyl)-2-hydroxyethanone (2i):** <sup>[11]</sup>

Yield 70%; light yellow solid; mp 79–82 °C; IR (KBr): 3429, 3399, 1683, 1566, 1424, 1227, 1112, 788, 702 cm<sup>-1</sup>; <sup>1</sup>H NMR (400 MHz, CDCl<sub>3</sub>): δ (ppm) 8.06 (s, 1H), 7.84 (d, J = 7.6 Hz, 1H), 7.76 (d, J = 8.0 Hz, 1H), 7.40 (t, J = 8.0 Hz, 1H), 4.87 (s, 1H), 3.44 (s, 1H); <sup>13</sup>C NMR (100 MHz, CDCl<sub>3</sub>) δ (ppm) 197.3, 137.1, 135.0, 130.7, 130.5, 126.1, 123.3, 65.5; MS (EI): m/z 216.11 (M+1, 7.51%), 214.11(M-1, 7.21), 183.03 (100).

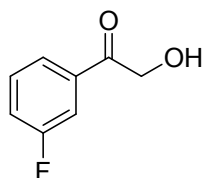

**1-(3-fluorophenyl)-2-hydroxyethanone (2j):**

Yield 68%; yellow solid; mp 67–70°C; IR (KBr): 3433, 3396, 1686, 1589, 1453, 1259, 1099, 867, 793, 772, 680 cm<sup>-1</sup>; <sup>1</sup>H NMR (600 MHz, CDCl<sub>3</sub>): δ (ppm) 7.70 (d, J = 7.2 Hz, 1H), 7.66–7.61 (m, 1H), 7.53–7.48 (m, 1H), 7.38–7.32 (m, 1H), 4.87 (s, 2H), 3.47 (s, 1H); <sup>13</sup>C NMR (100 MHz, CDCl<sub>3</sub>) δ (ppm) 197.4, 164.1, 135.4, 130.8, 130.7, 123.4, 121.4, 121.2, 114.6, 114.4, 65.6; MS (EI): m/z 154.12 (M, 8.71%), 123.05 (100).

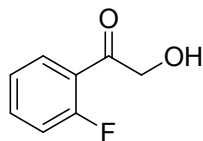

**1-(2-fluorophenyl)-2-hydroxyethanone (2k):** <sup>[3]</sup>

Yield 62%; yellow oily liquid; IR (KBr): 3448, 1699, 1611, 1486, 1356, 1279, 1222, 1094, 976,

761  $\text{cm}^{-1}$ ;  $^1\text{H}$  NMR (600 MHz,  $\text{CDCl}_3$ ):  $\delta$  (ppm) 8.07 (t,  $J = 7.2$  Hz, 1H), 7.66-7.56 (m, 1H), 7.31 (t,  $J = 7.2$  Hz, 1H), 7.19 (t,  $J = 9.6$  Hz, 1H), 4.81 (s, 2H), 3.77 (s, 1H);  $^{13}\text{C}$  NMR (100 MHz,  $\text{CDCl}_3$ )  $\delta$  (ppm) 196.9, 164.1, 136.0, 135.9, 135.3, 130.6, 124.9, 124.8, 116.9, 116.7, 69.2; MS (EI):  $m/z$  154.13 (M, 1.52%), 123.00 (100).

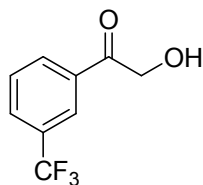

**2-hydroxy-1-(3-(trifluoromethyl)phenyl)ethanone (2l):**

Yield 67%; light yellow solid; mp 93–96°C; IR (KBr): 3429, 1701, 1334, 1174, 1127, 1072, 690  $\text{cm}^{-1}$ ;  $^1\text{H}$  NMR (600 MHz,  $\text{CDCl}_3$ ):  $\delta$  (ppm) 8.19 (s, 1H), 8.10 (s, 1H), 7.89 (s, 1H), 7.68 (s, 1H), 4.95 (s, 2H), 3.86 (s, 1H);  $^{13}\text{C}$  NMR (100 MHz,  $\text{CDCl}_3$ )  $\delta$  (ppm) 197.3, 133.9, 133.3, 130.8, 130.6, 130.2, 129.7, 129.2, 127.1, 124.6, 65.6; MS (EI):  $m/z$  204.08 (M, 2.05%), 173.08 (100).

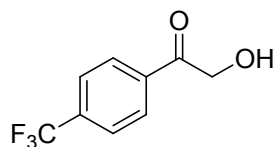

**2-hydroxy-1-(4-(trifluoromethyl)phenyl)ethanone (2m):**

Yield 62%; White solid; mp 110–113°C; IR (KBr): 3429, 3358, 1688, 1418, 1329, 1235, 1171, 1135, 1109, 1065, 981, 842, 765, 622, 600, 500  $\text{cm}^{-1}$ ;  $^1\text{H}$  NMR (600 MHz,  $\text{CDCl}_3$ ):  $\delta$  (ppm) 8.05 (d,  $J = 8.4$  Hz, 2H), 7.79 (d,  $J = 8.4$  Hz, 2H), 4.93 (s, 2H), 3.42 (s, 1H);  $^{13}\text{C}$  NMR (100 MHz,  $\text{CDCl}_3$ )  $\delta$  (ppm) 197.6, 136.0, 135.6, 128.1, 126.1, 126.0, 124.7, 65.8; MS (EI):  $m/z$  205.35 (M+1, 0.42%), 204.27 (M, 0.95), 73.09 (100).

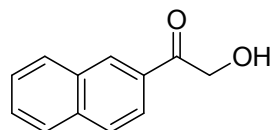

**2-hydroxy-1-(naphthalen-2-yl)ethanone (2n):**

Yield 72%; light yellow solid; mp 108–111°C; IR (KBr): 3429, 3392, 1680, 1624, 1405, 1184, 1102, 1018, 855, 820, 744, 612, 478  $\text{cm}^{-1}$ ;  $^1\text{H}$  NMR (400 MHz,  $\text{CDCl}_3$ ):  $\delta$  (ppm) 8.42 (s, 1H), 7.95–7.87 (m, 4H), 7.63–7.24 (m, 2H), 5.02 (s, 2H), 3.61 (s, 1H);  $^{13}\text{C}$  NMR (100 MHz,  $\text{CDCl}_3$ )  $\delta$  (ppm) 198.3, 136.1, 132.4, 130.6, 129.6, 129.5, 129.0, 128.9, 127.9, 127.1, 123.0, 65.5; MS (EI):  $m/z$  187.23 (M+1, 2.16%), 186.14 (M, 19.50), 155.10 (100).

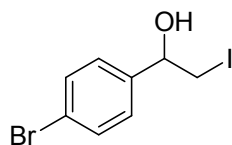

**1-(4-bromophenyl)-2-iodoethanol (C):**

Yield 27%; brown solid; mp 76–79°C; IR (KBr): 3335, 1501, 1406, 1128, 1603, 1007, 967, 845  $\text{cm}^{-1}$ ;  $^1\text{H}$  NMR (400 MHz,  $\text{CDCl}_3$ ):  $\delta$  (ppm) 7.49 (d,  $J = 6.0$  Hz, 2H), 7.23 (d,  $J = 8.4$  Hz, 2H), 4.77 (d,  $J = 7.8$  Hz, 1H), 3.46-3.42 (m, 1H), 3.34 (t,  $J = 8.4$  Hz, 1H), 2.67 (s, 1H);  $^{13}\text{C}$  NMR (100 MHz,  $\text{CDCl}_3$ )  $\delta$  (ppm) 140.0, 131.7, 127.4, 122.1, 73.2, 14.9; MS (EI):  $m/z$  326.10 (M, 5.13%),

185.15(100).

### 3.Reference:

- [1] Chen, C. Q.; Feng, G. Z.; Zhang, G. Z.; Zhao, Q.; Huang, G. S. *Synlett* **2008**, 3205-3208.  
[2] Utsukihara, T.; Nakamura, H.; Watanabe, M.; Horiuchi, C. A.; *Tetrahedron Lett.* **2006**, 47, 9359-9364.  
[3] Mclaughlin, M.; Belyk, K. M.; Qian, G.; Reamer, R. A.; Cheng, C. Y. *J. Org. Chem.* **2012**, 77, 5144-5148.

### 4. Crystallographic data and molecular structure of compounds **2g** and **C**

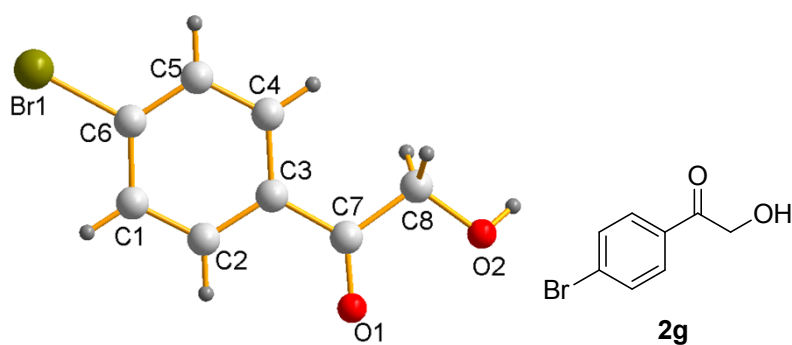

**Fig. 1.** X-ray crystal structure of compound **3ba**

Crystal structure data for compound **2g**:  $C_8H_7BrO_2$ , chemical formula weight: 215.05, Monoclinic space group  $P2_1$ ,  $a = 4.6871(6)$  Å,  $b = 5.3721(7)$  Å,  $c = 15.900(2)$  Å;  $\alpha = 90^\circ$ ,  $\beta = 97.381(2)^\circ$ ,  $\gamma = 90^\circ$ ,  $V = 397.03(9)$  Å<sup>3</sup>,  $T = 298(2)$  K,  $Z = 2$ ,  $D_C = 1.799$  Mg/m<sup>3</sup>,  $\mu = 5.119$  mm<sup>-1</sup>,  $\lambda = 0.71073$  Å,  $F(000)$  212, crystal size 0.16 x 0.12 x 0.10 mm<sup>3</sup>, 1460 independent reflections [ $R(\text{int}) = 0.0226$ ], reflections collected 3959, refinement method: full-matrix least-squares on  $F^2$ : goodness-of-fit on  $F^2$  1.075, final R indices [ $I > 2\sigma(I)$ ],  $R_1 = 0.0282$ ,  $wR_2 = 0.0707$ , largest diff. peak and hole 0.326 and  $-0.290$  e.Å<sup>-3</sup>. CCDC 973925 contains the supplementary crystallographic data for this paper. These data can be obtained free of charge from The Cambridge Crystallographic Data Centre via [www.ccdc.cam.ac.uk/data\\_request/cif](http://www.ccdc.cam.ac.uk/data_request/cif).

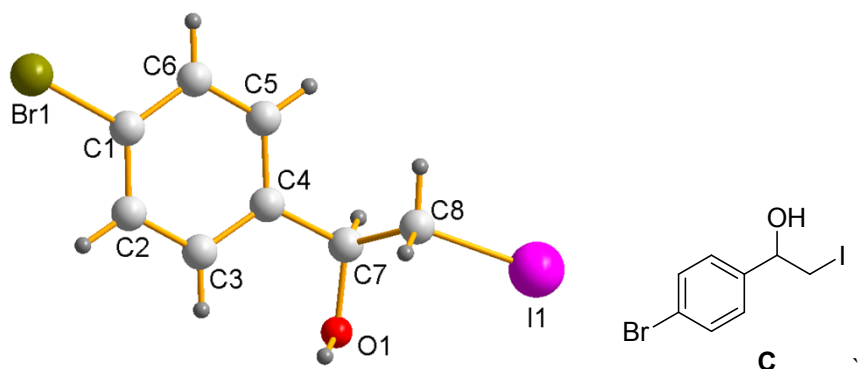

**Fig. 2.** X-ray crystal structure of compound **C**

Crystal structure data for compound **C**:  $C_8H_8BrIO$ , chemical formula weight: 326.95, Monoclinic space group  $P2_1(1)/n$ ,  $a = 13.414(3)$  Å,  $b = 4.5553(8)$  Å,  $c = 15.692(3)$  Å;  $\alpha = 90^\circ$ ,  $\beta = 100.321(3)^\circ$ ,  $\gamma = 90^\circ$ ,  $V = 943.3(3)$  Å<sup>3</sup>,  $T = 296(2)$  K,  $Z = 4$ ,  $D_C = 2.302$  Mg/m<sup>3</sup>,  $\mu = 7.573$  mm<sup>-1</sup>,  $\lambda = 0.71073$

Å, F(000) 608, crystal size 0.20 x 0.10 x 0.10 mm<sup>3</sup>, 2724 independent reflections [R(int) = 0.0482], reflections collected 7986, refinement method: full-matrix least-squares on F<sup>2</sup>: goodness-of-fit on F<sup>2</sup> 1.075, final R indices [I > 2σ(I)], R1 = 0.0368, wR2 = 0.1089, largest diff. peak and hole 1.459 and -1.373 e.Å<sup>-3</sup>. CCDC 973926 contains the supplementary crystallographic data for this paper. These data can be obtained free of charge from The Cambridge Crystallographic Data Centre via [www.ccdc.cam.ac.uk/data\\_request/cif](http://www.ccdc.cam.ac.uk/data_request/cif).

## 5. Labeling experiments

A mixture of styrene (1.0 mmol), I<sub>2</sub> (1.0 mmol), TBHP (4.0 mmol, dissolution in decane and purchase from Sigma-aldrich) and 0.15 mL H<sub>2</sub>O<sup>18</sup> (O<sup>18</sup>>90%) in anhydrous DMSO (3-4 mL) under at room temperature. After the reaction completed, the reaction mixture was filtered, diluted with water and extracted with EtOAc (3×20 mL). The extract was washed with Na<sub>2</sub>S<sub>2</sub>O<sub>3</sub> (5% w/w, aq.), and brine successively. After drying over Na<sub>2</sub>SO<sub>4</sub> and evaporation, the crude product was purified by column chromatography on silica gel (eluent: petroleum ether/EtOAc) to afford the product **2aa** (78%).

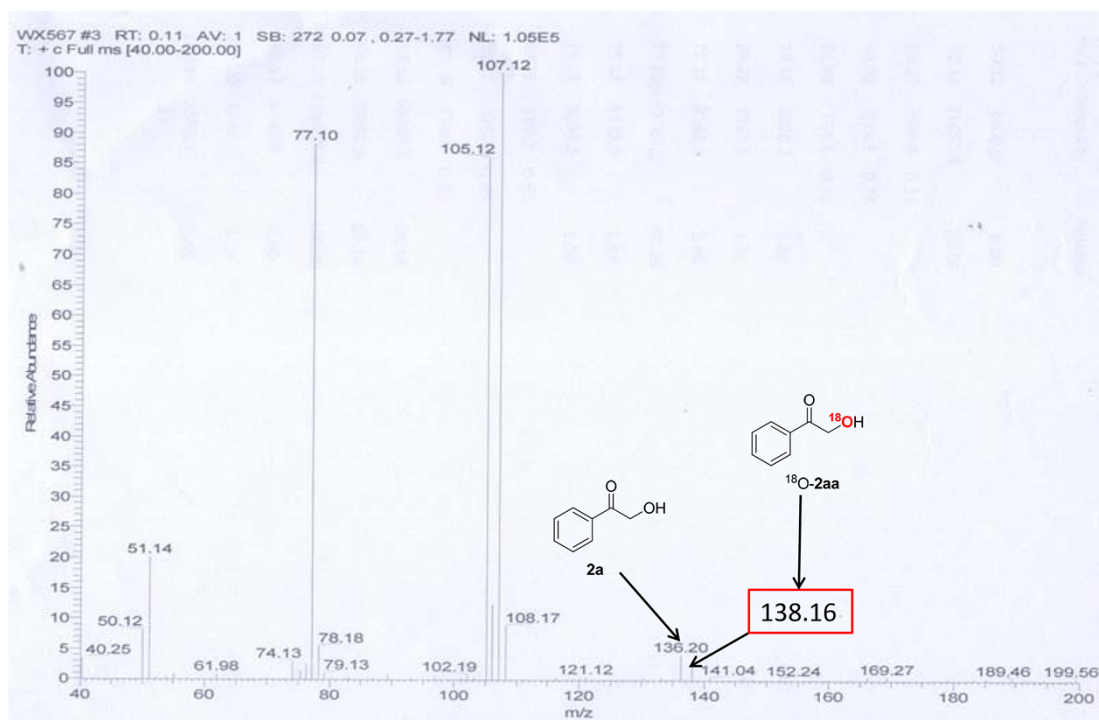

## 6. <sup>1</sup>H and <sup>13</sup>C NMR spectra of compounds 2 and C

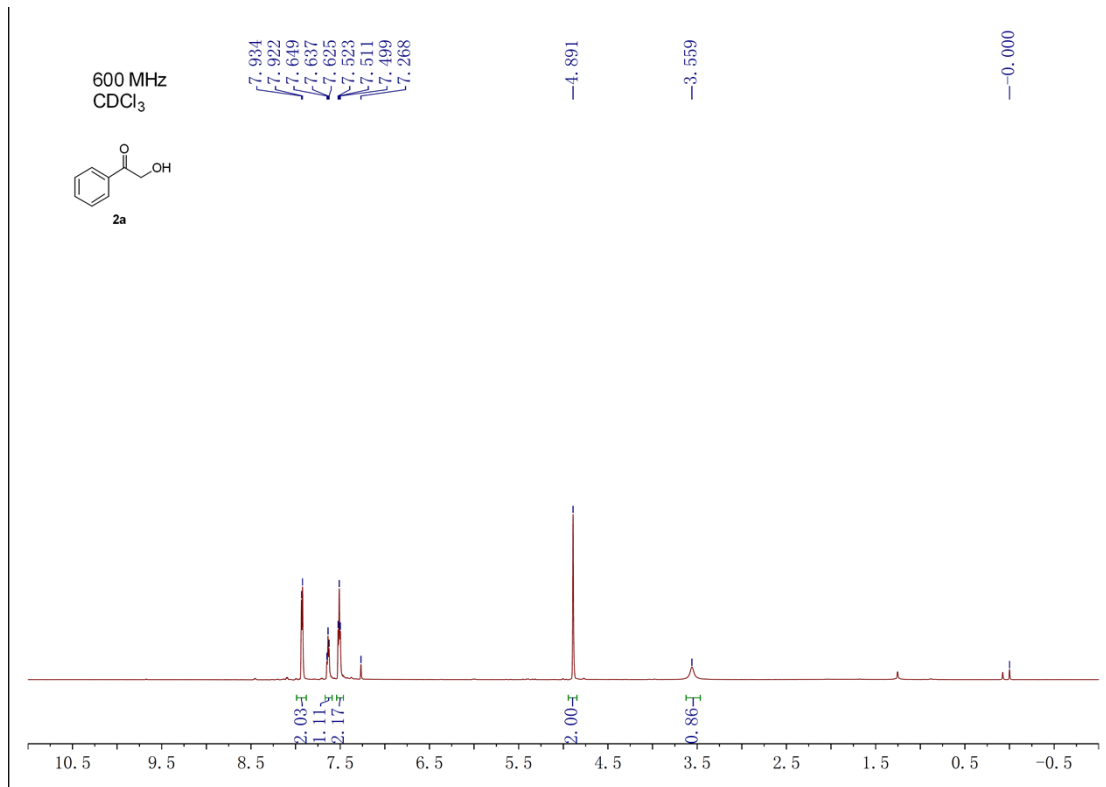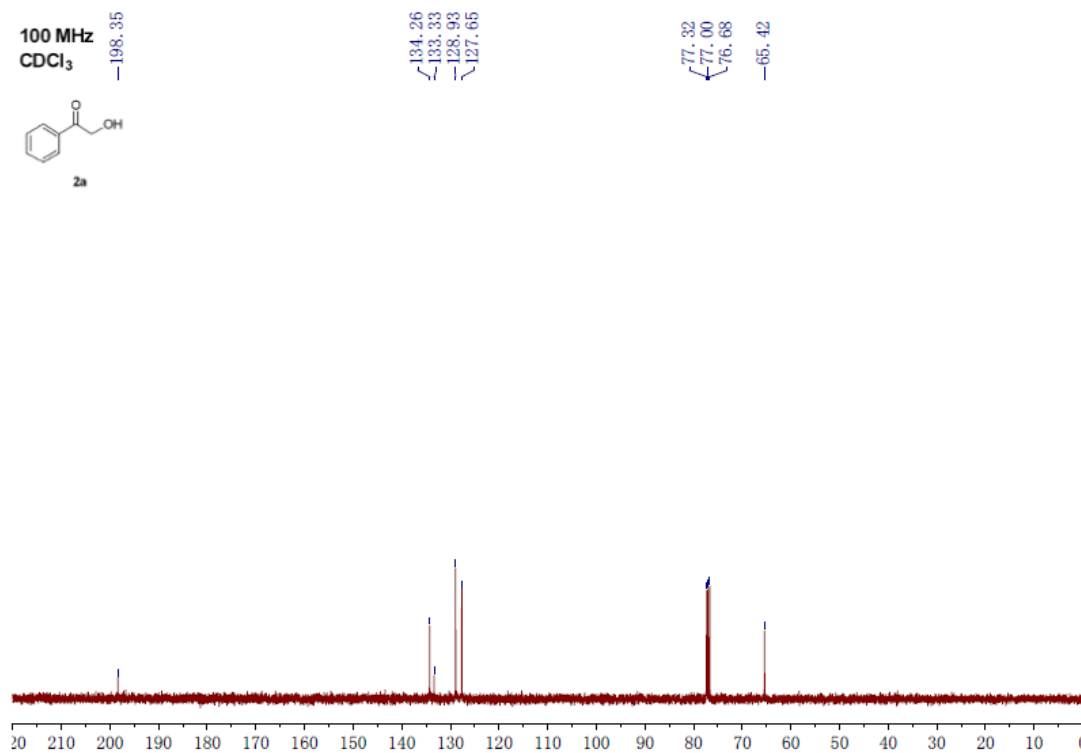



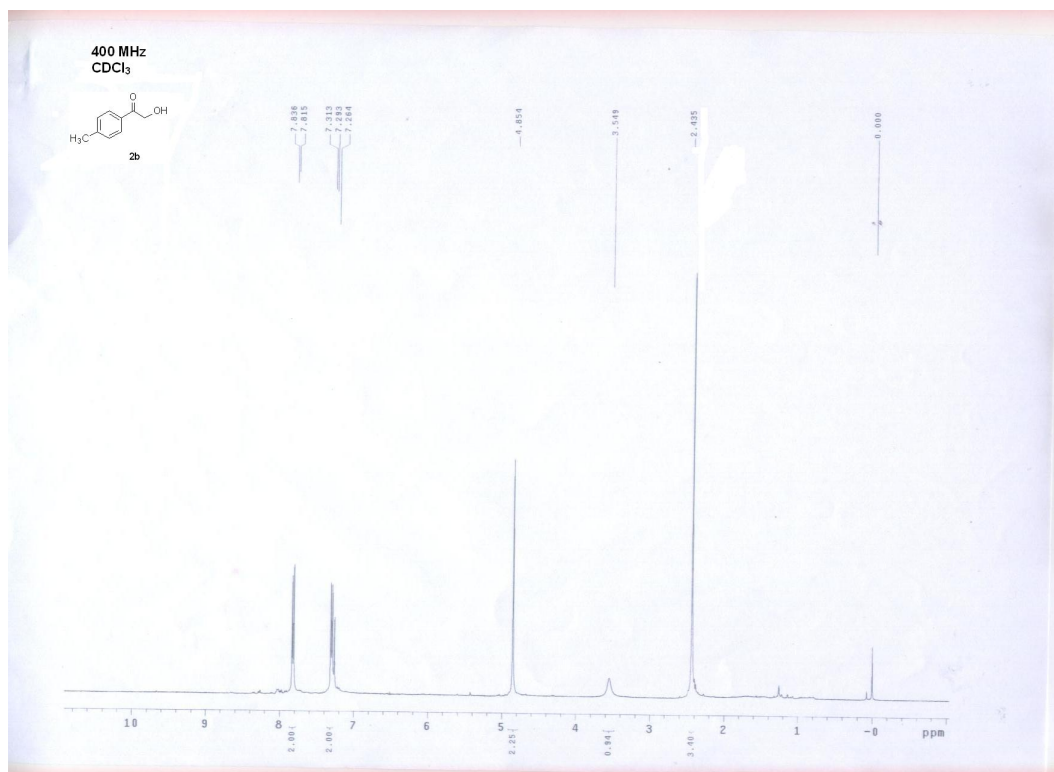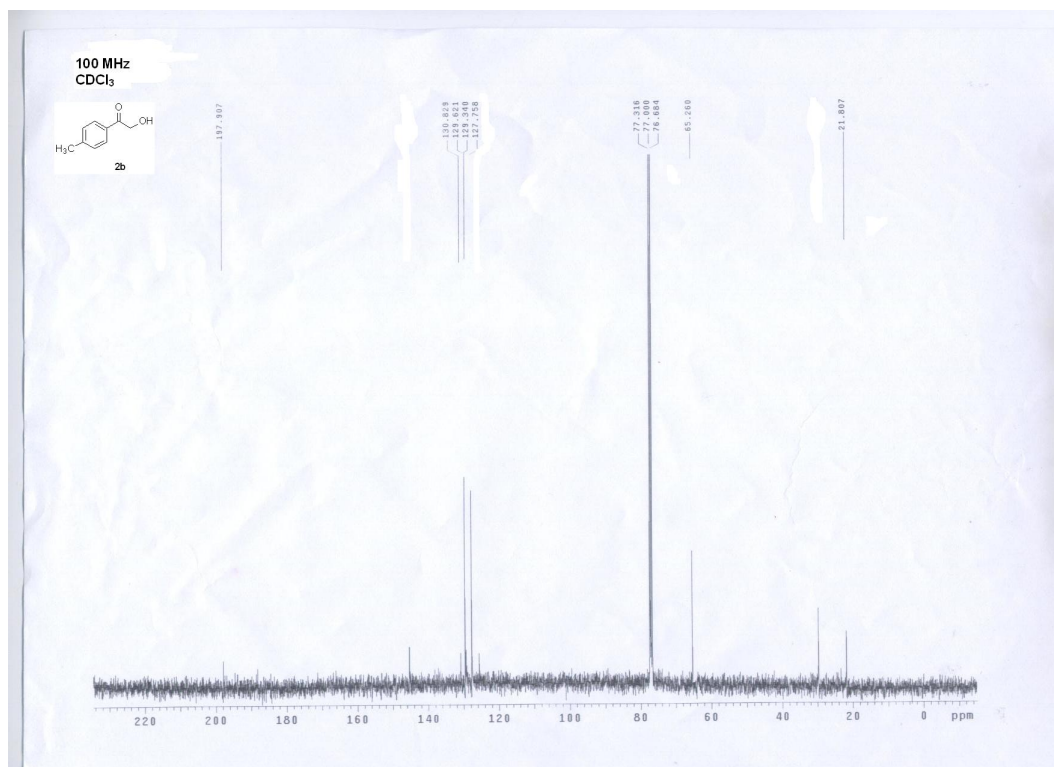

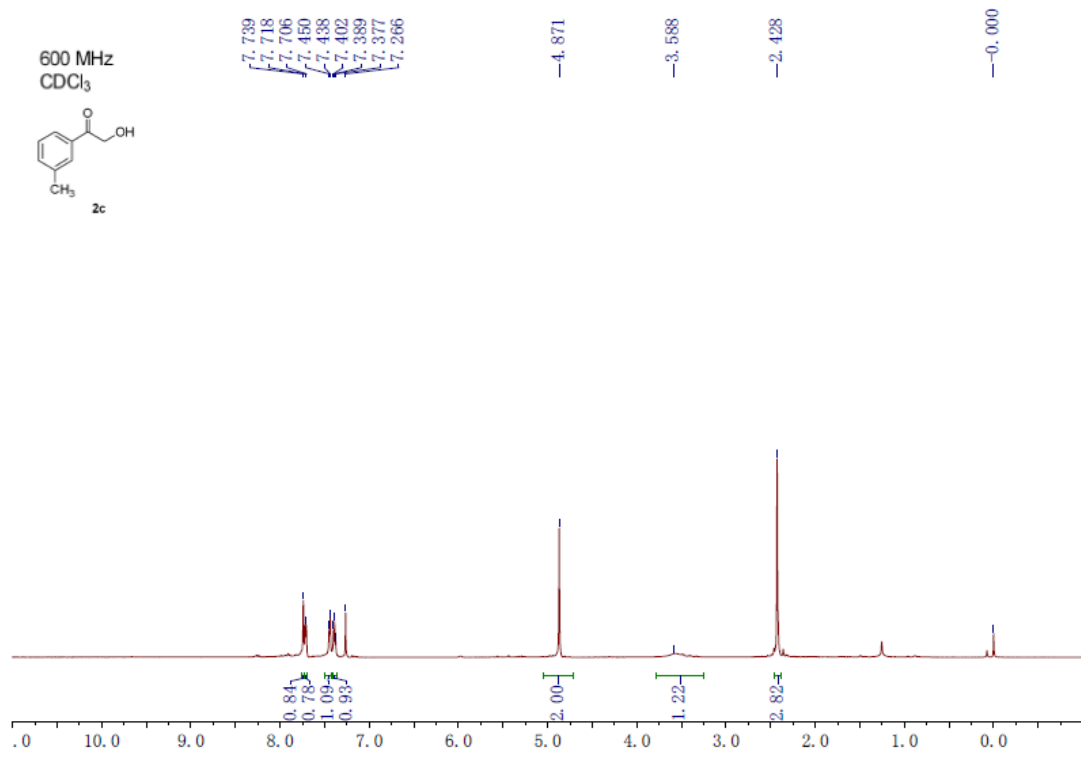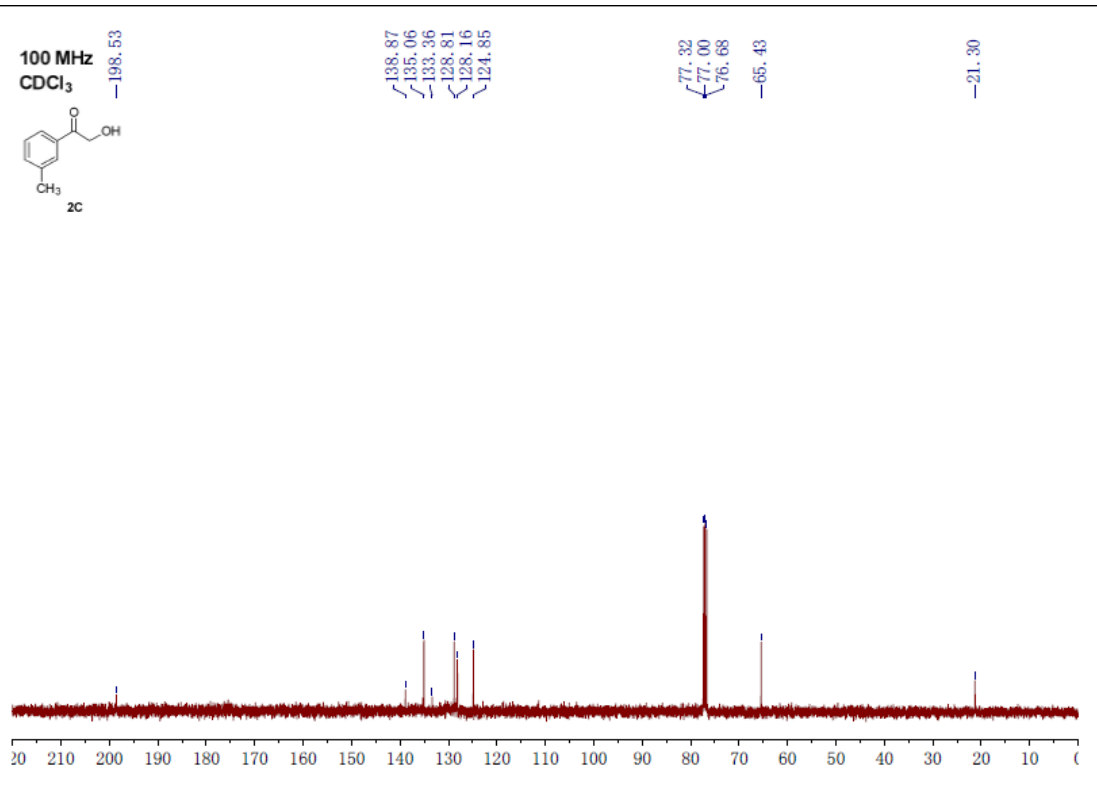

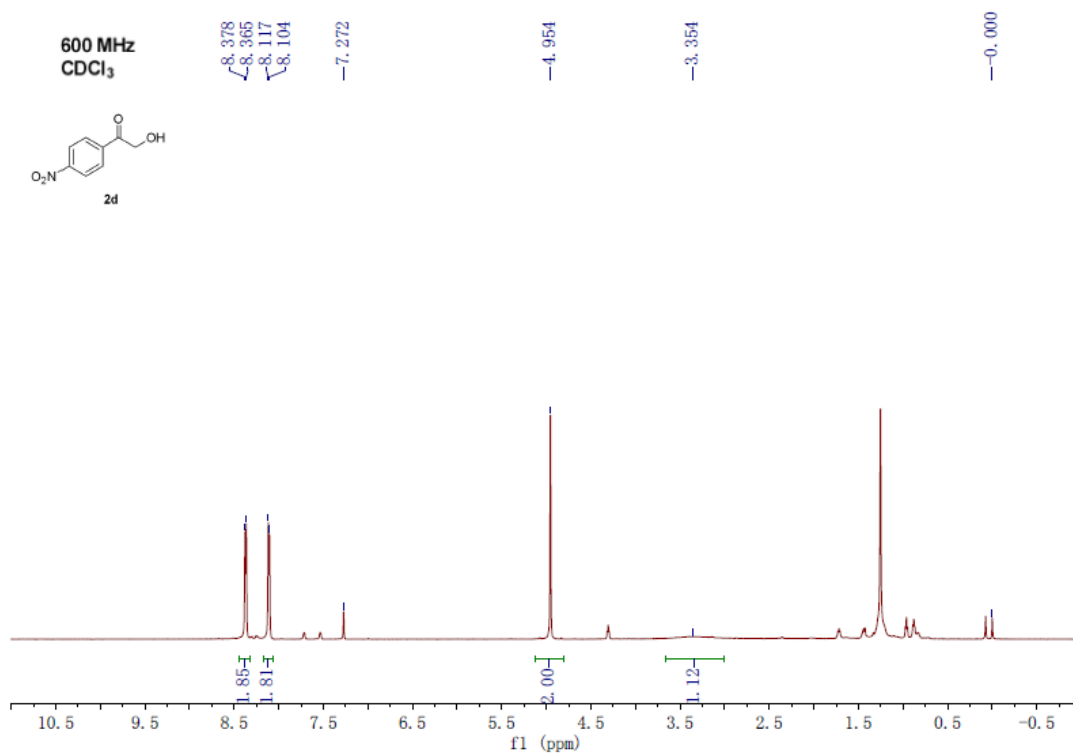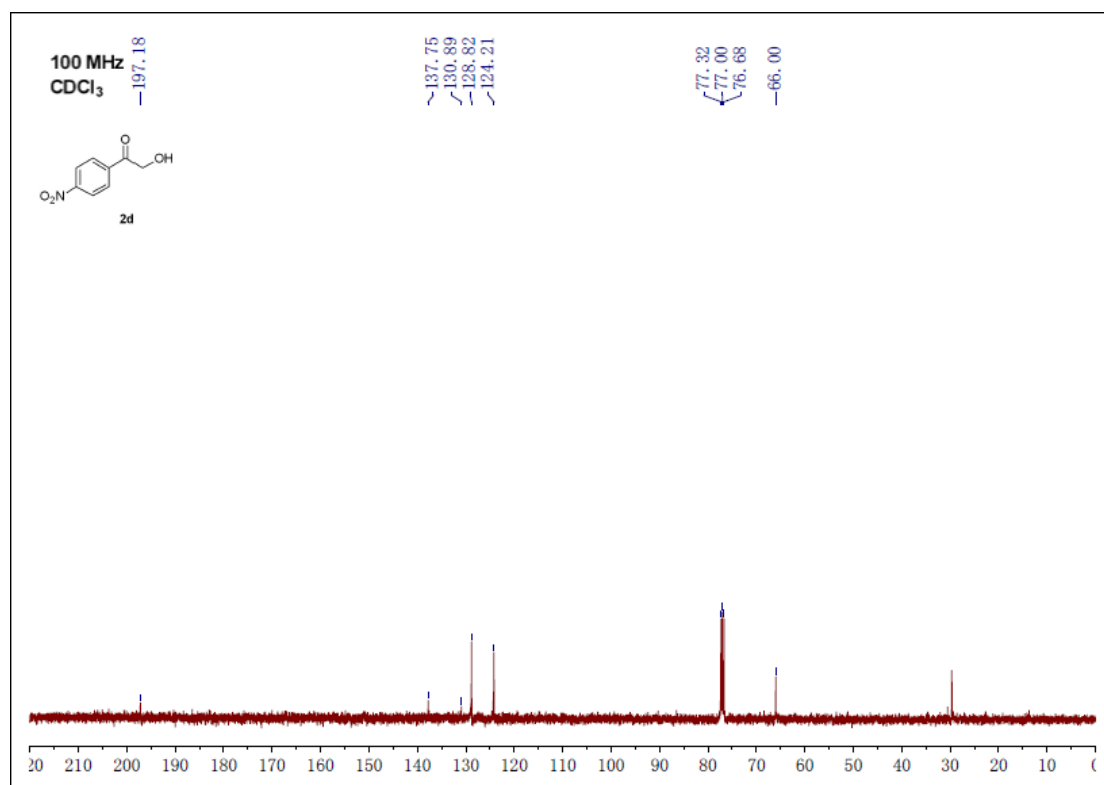

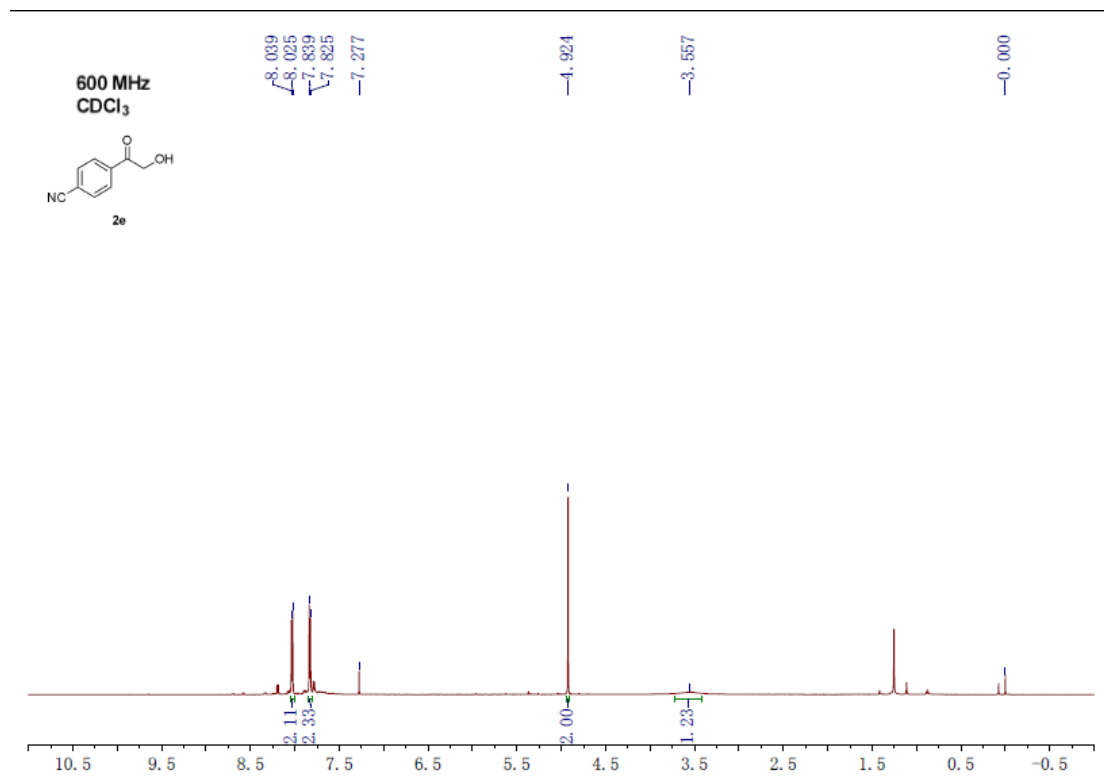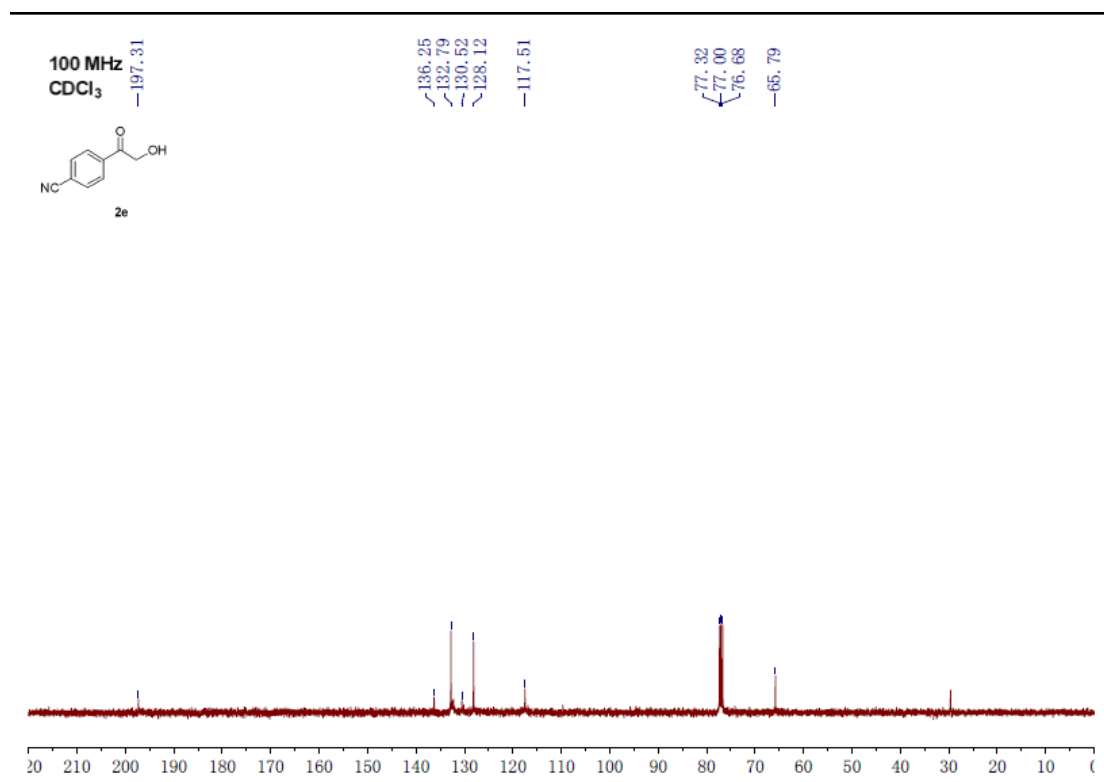

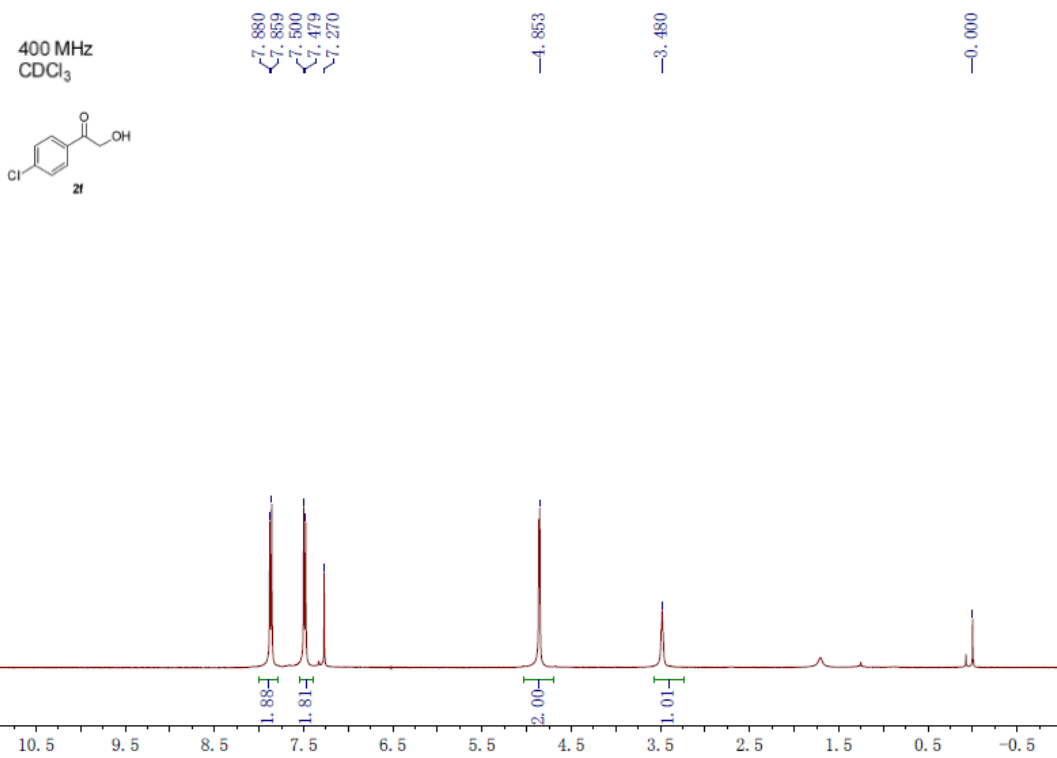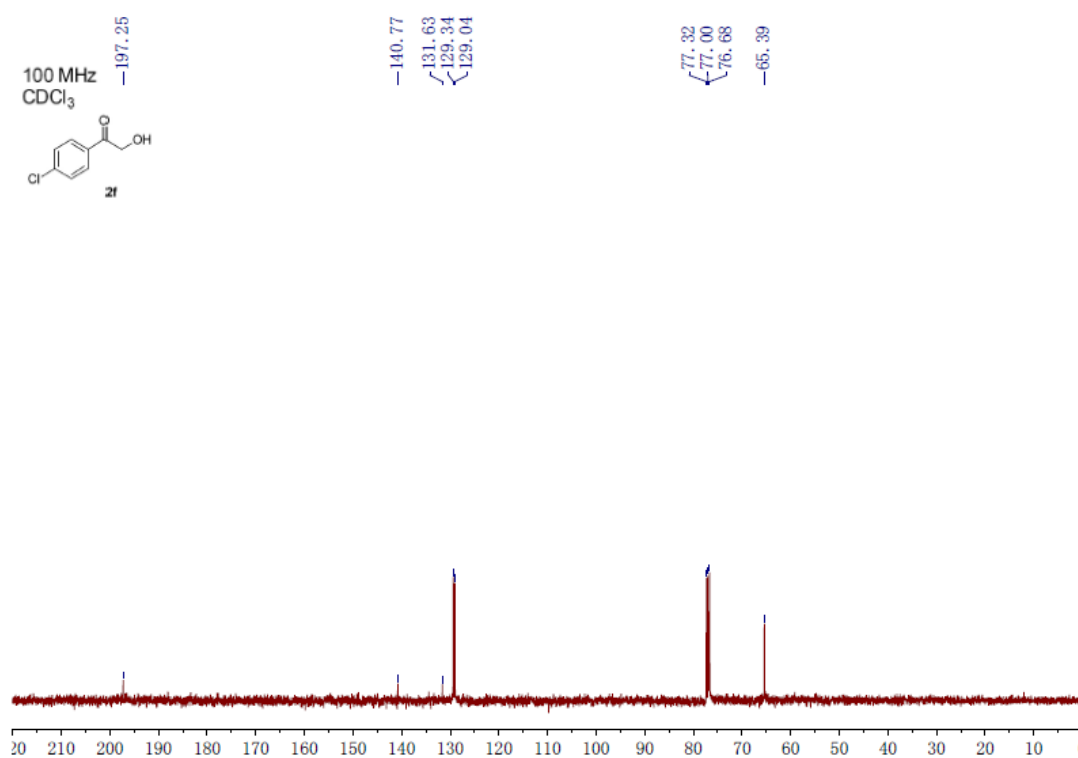

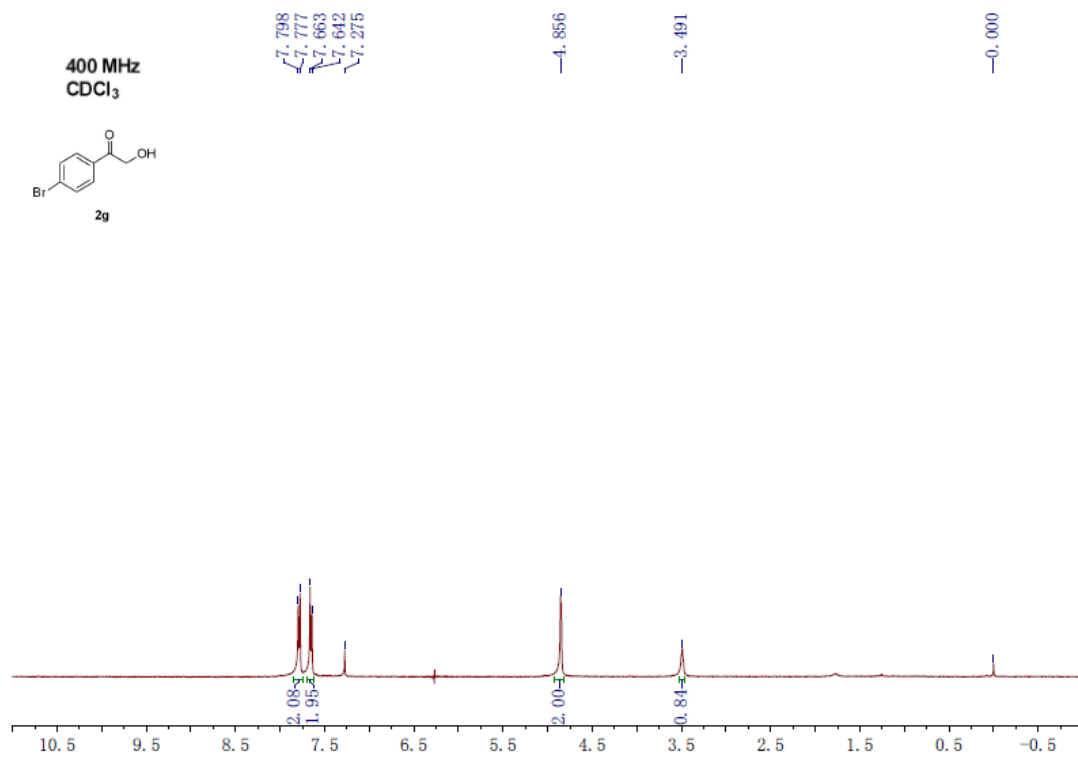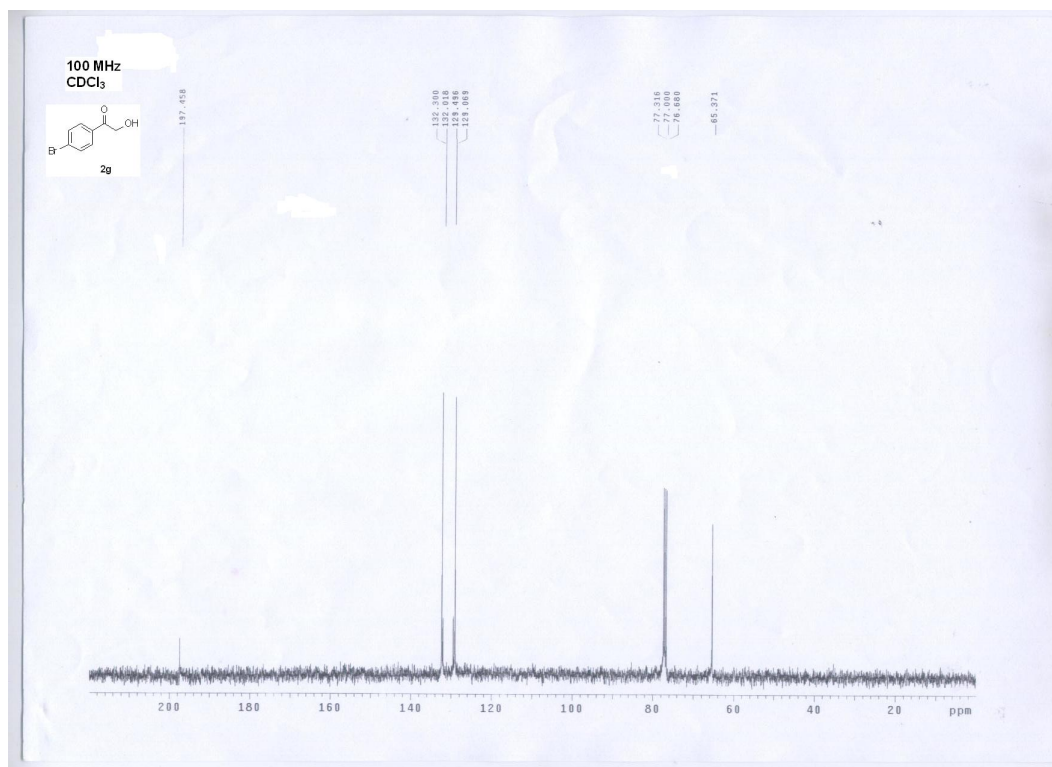

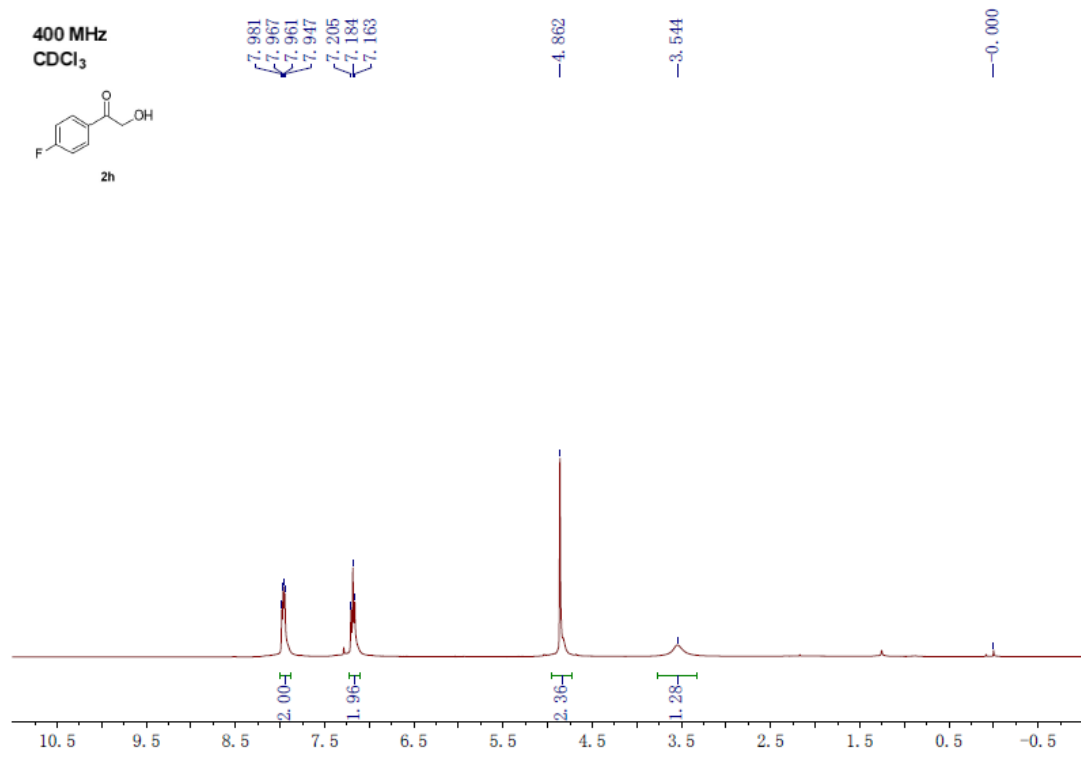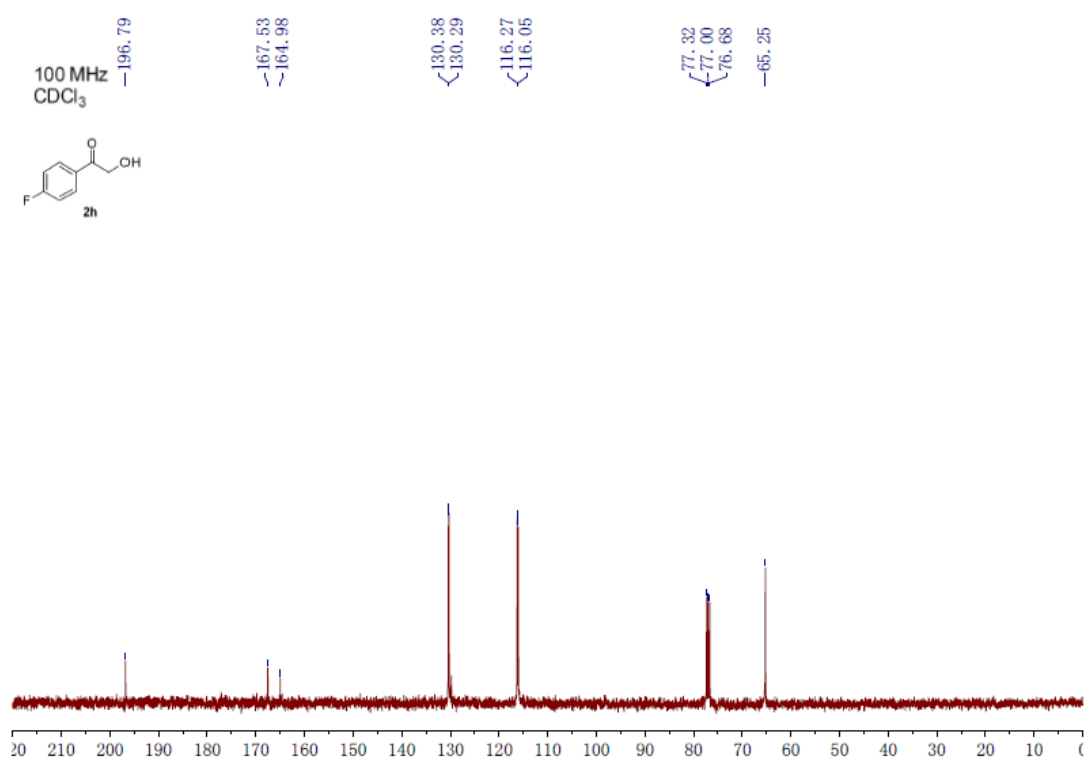

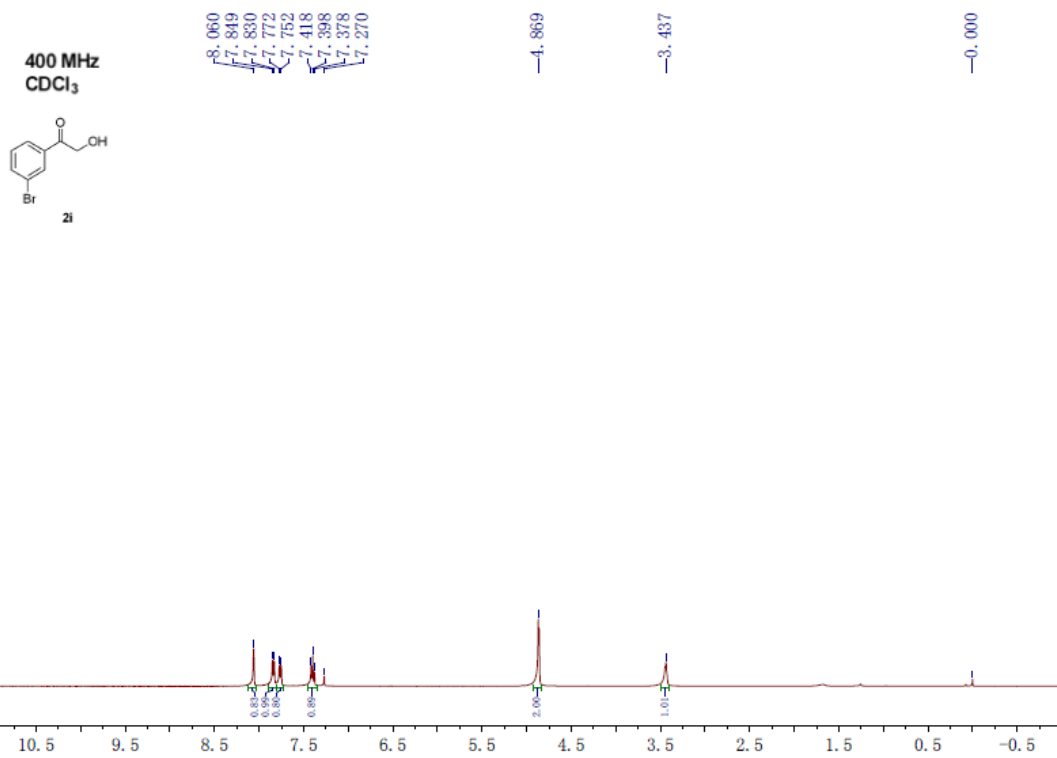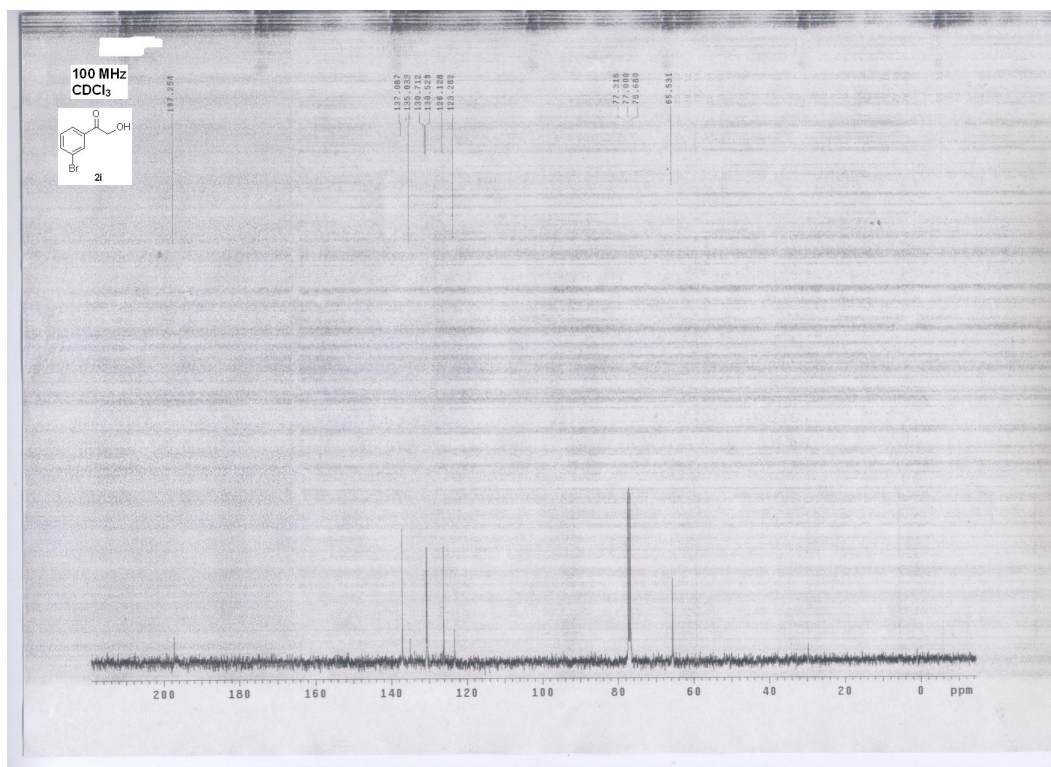



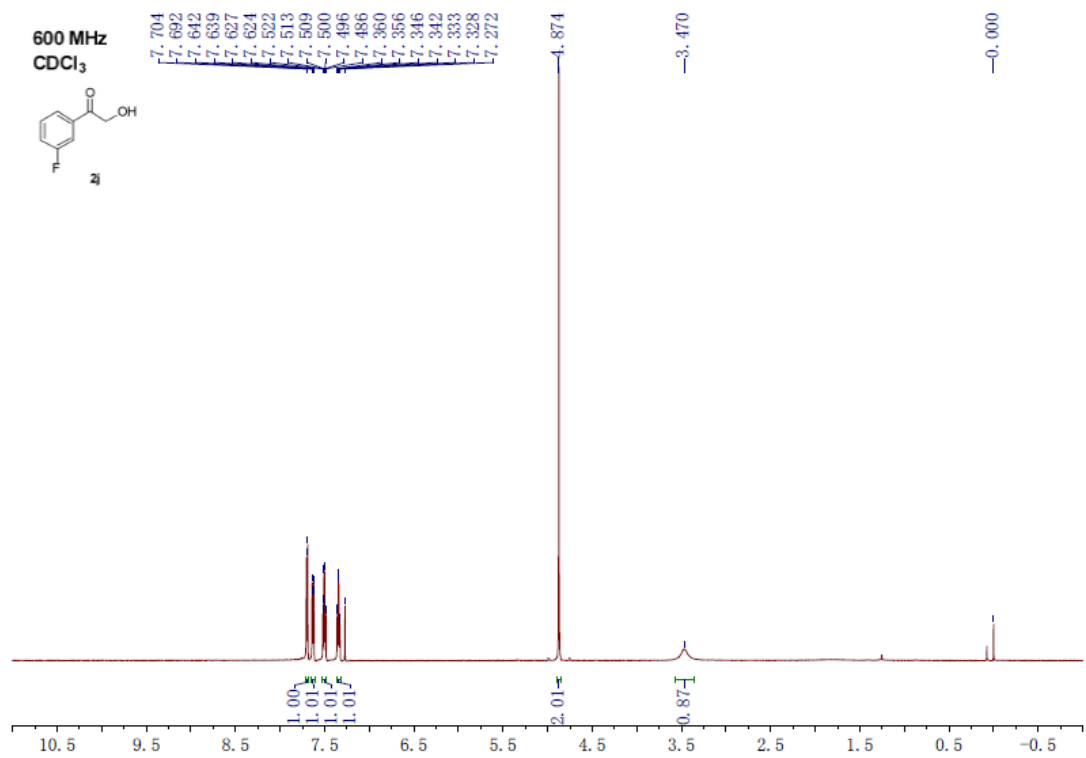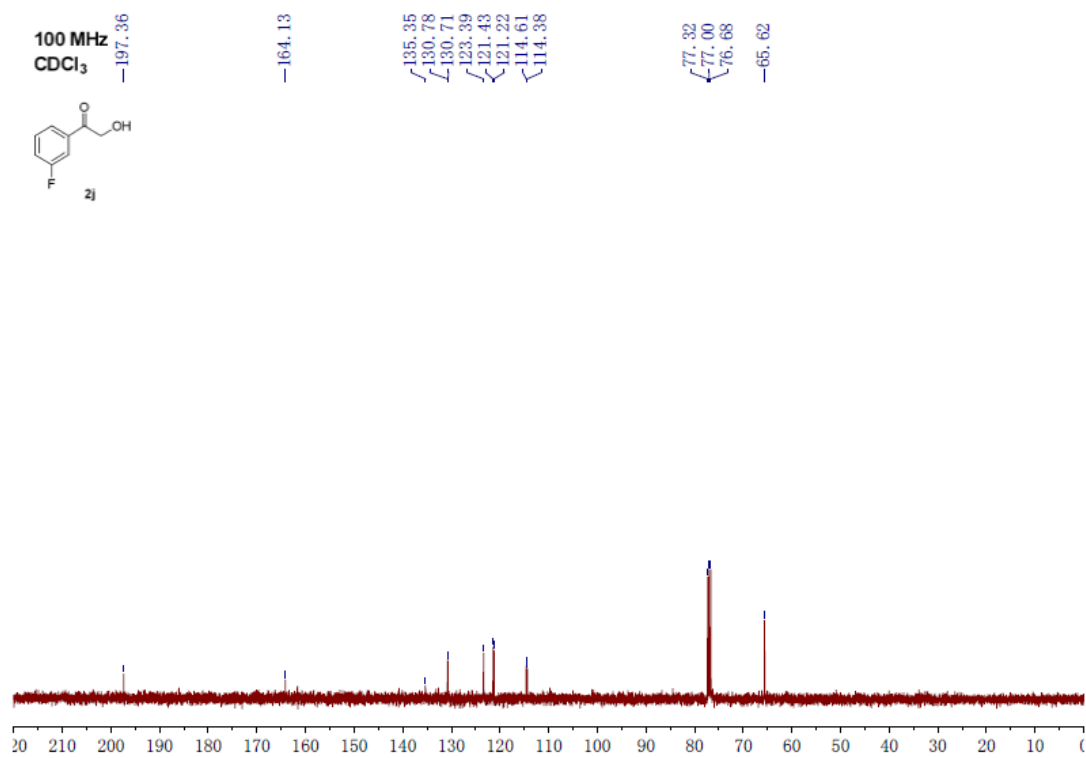

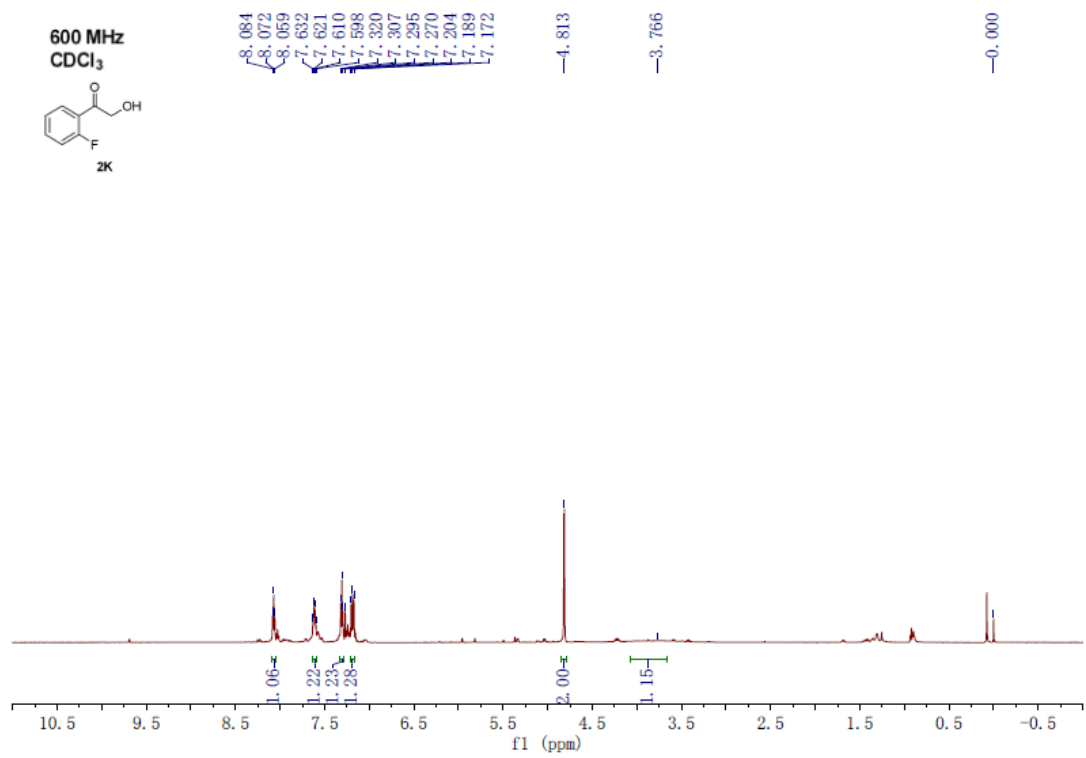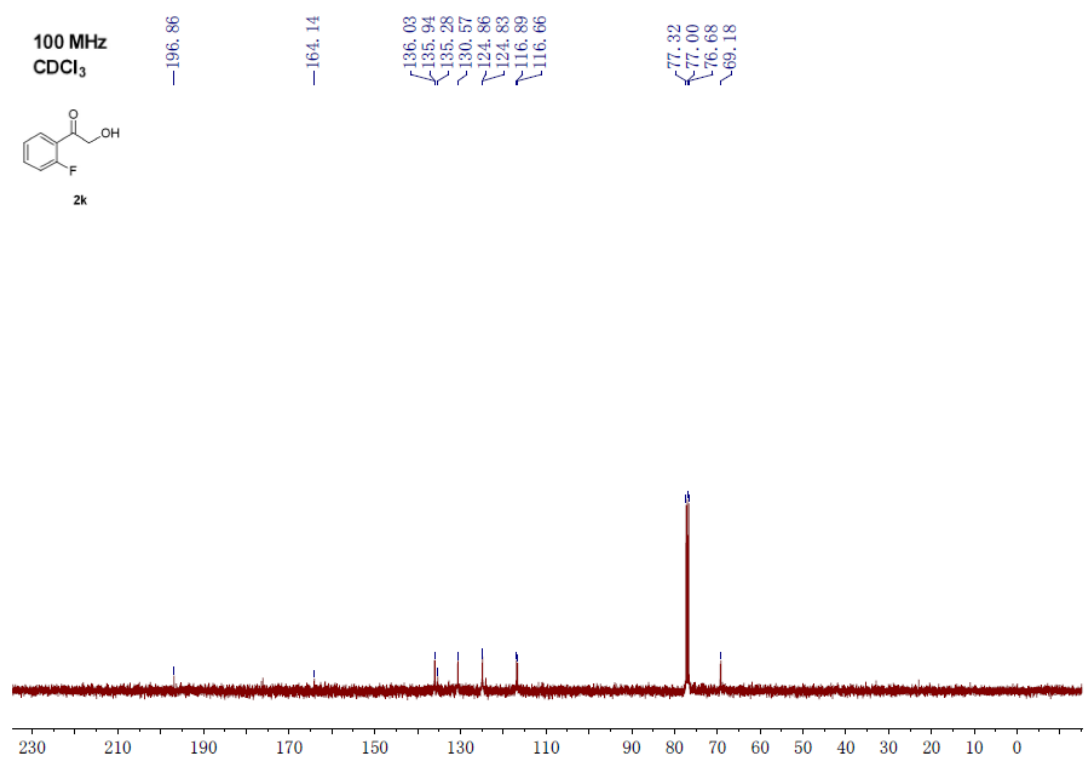

600 MHz  
CDCl<sub>3</sub>

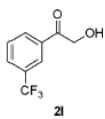

8.187  
8.104  
7.894  
7.677  
7.274

4.950

3.862

0.000

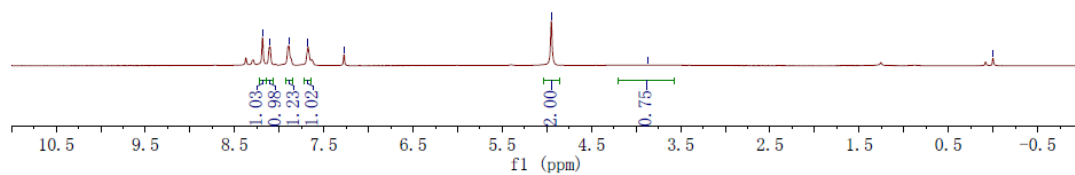

100 MHz  
CDCl<sub>3</sub>

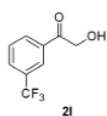

197.30

133.88  
133.30  
130.79  
130.63  
130.17  
129.71  
129.20  
127.08  
124.57

77.32  
77.00  
76.68  
65.61

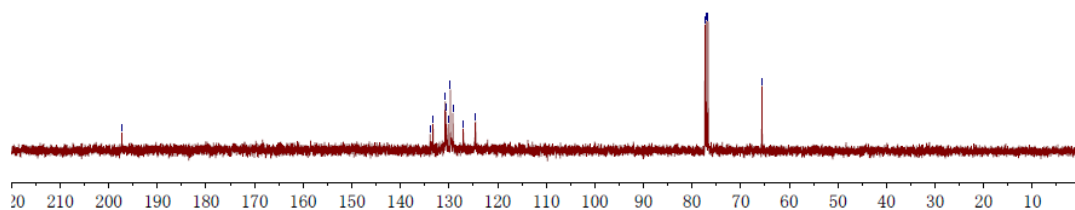

600 MHz  
CDCl<sub>3</sub>

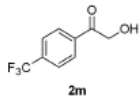

8.053  
8.039  
7.793  
7.779  
7.275

4.930

3.421

0.000

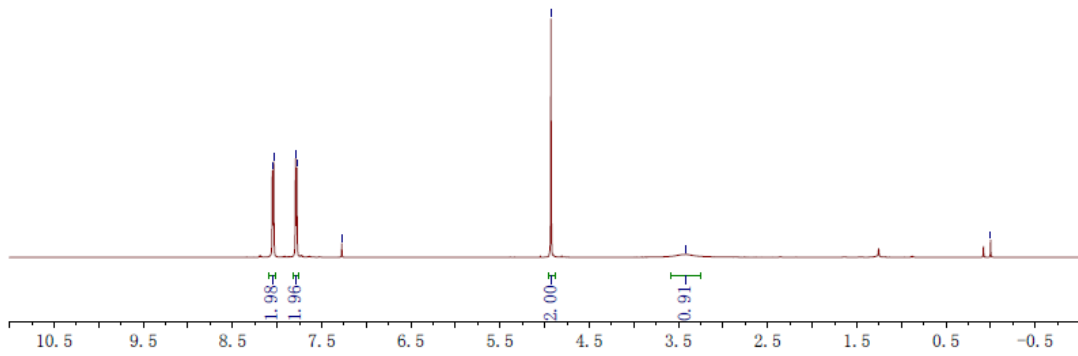

100 MHz  
CDCl<sub>3</sub>

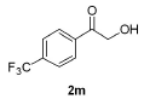

197.64

136.01  
135.63  
128.06  
126.06  
124.67

77.32  
77.00  
76.68  
65.77

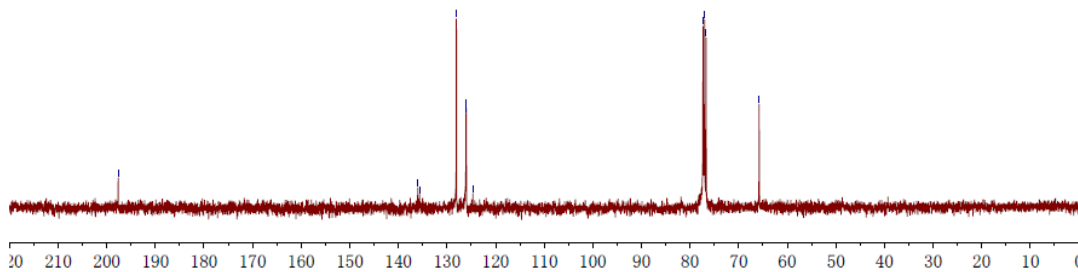

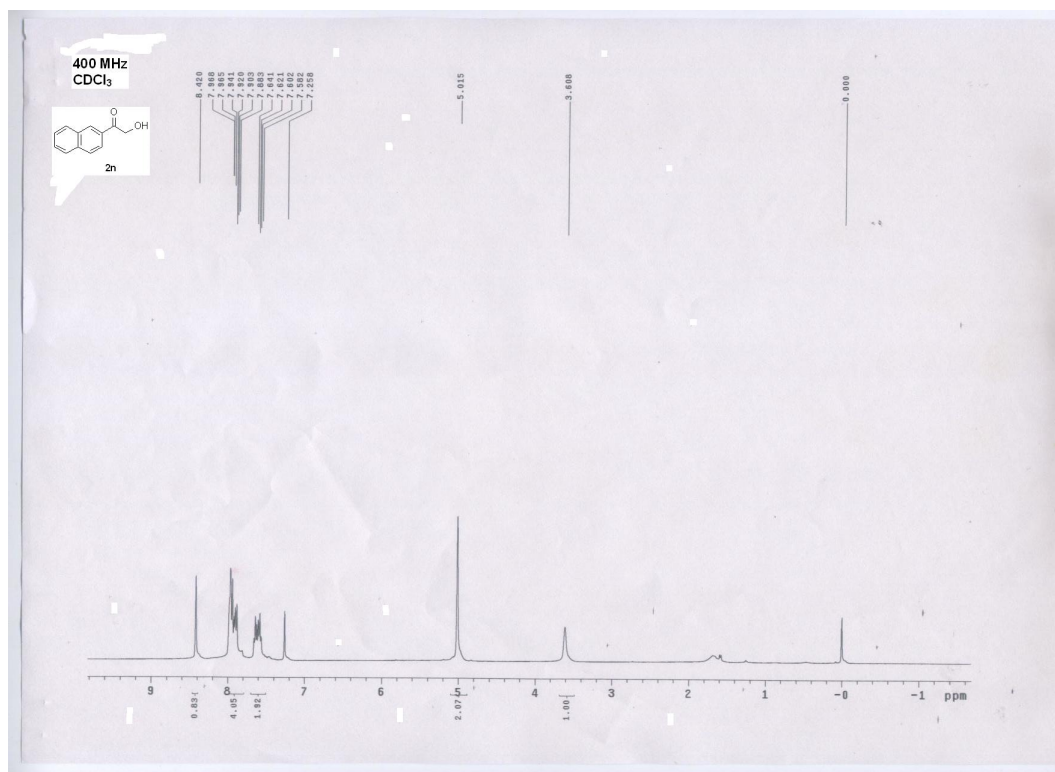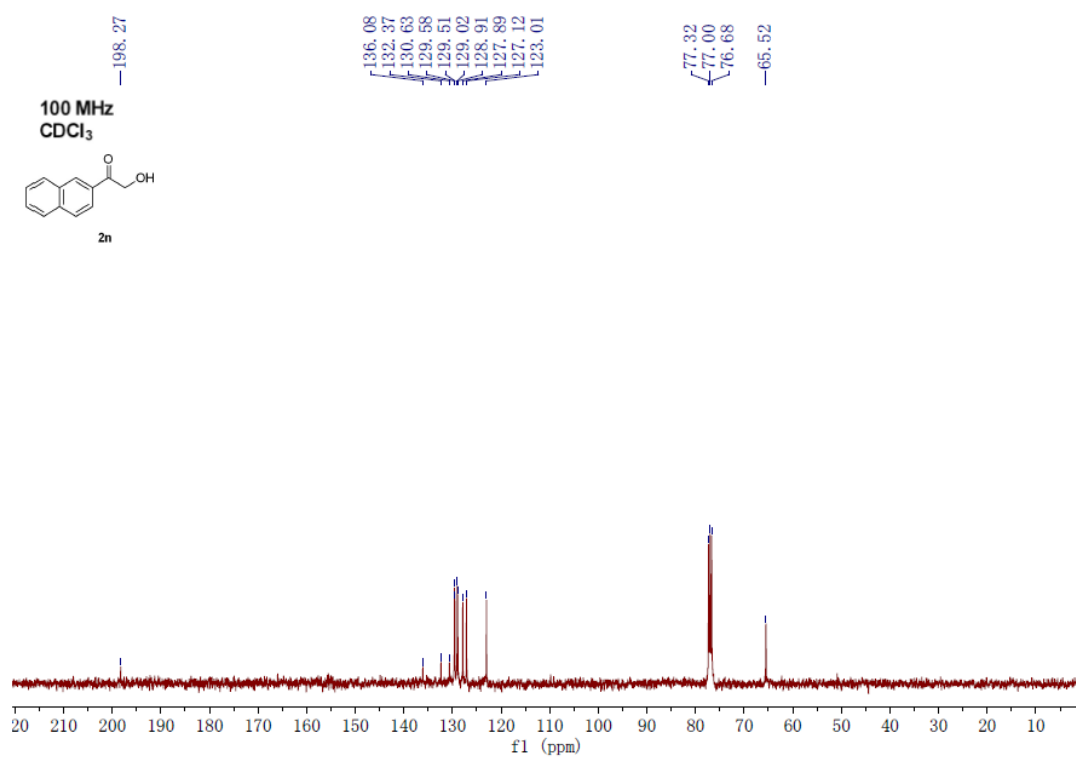

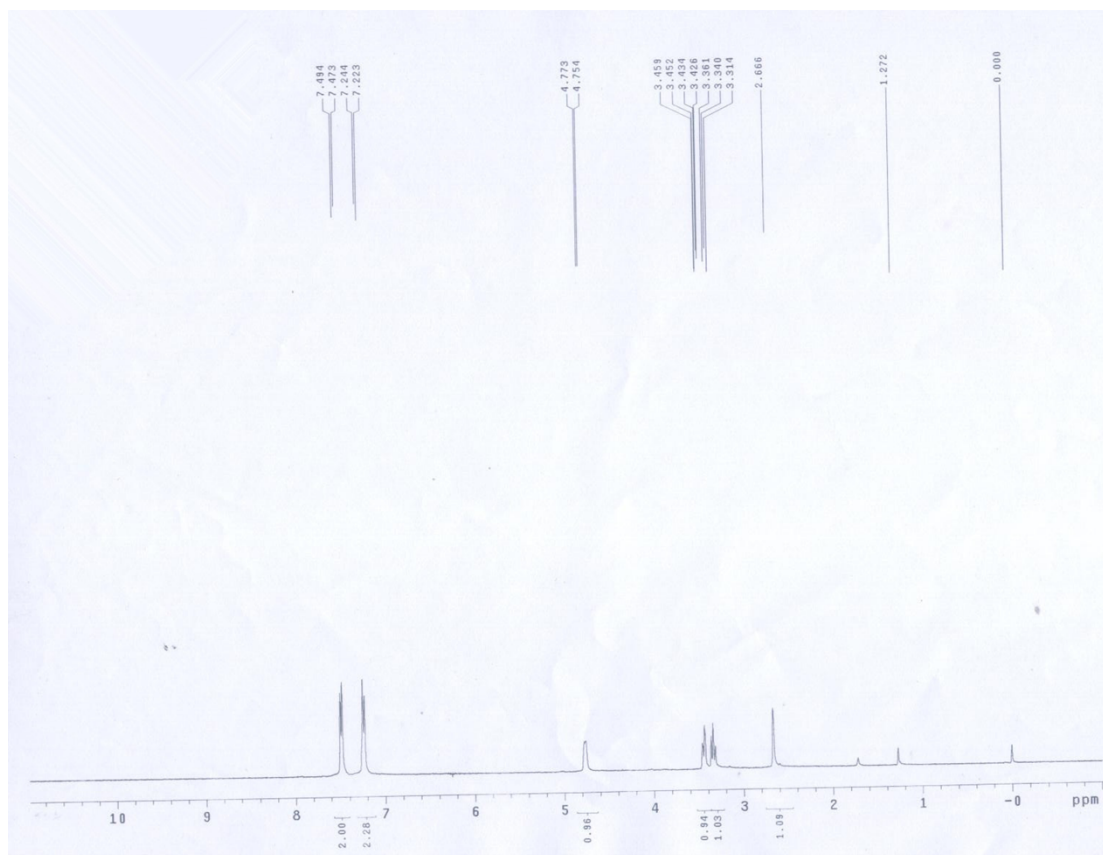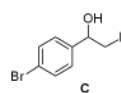

-140.00

131.72

127.41

122.14

77.32

77.00

76.68

73.21

-14.86

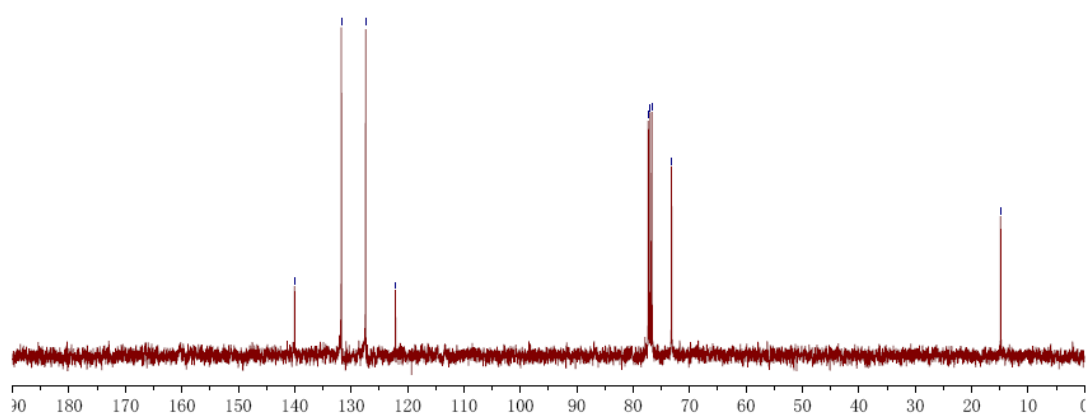

Supplement: c4ra07012g1.pdf [file c4ra07012g1.pdf]
